# Supplementary material for: Model-based action planning involves cortico-cerebellar and basal ganglia networks
Source: PubMed Central journal article supplement (PMC4990901; doi:10.1038/srep31378), 2016-08-19
Supplement: srep31378-s1.pdf [file srep31378-s1.pdf]

# Supplementary Information

## **Model-based action planning involves cortico-cerebellar and basal ganglia networks**

Alan S. R. Fermin,<sup>1\*</sup> Takehiko Yoshida,<sup>2</sup> Junichiro Yoshimoto,<sup>3</sup> Makoto Ito,<sup>4</sup> Saori Tanaka,<sup>5</sup> Kenji Doya<sup>4,\*</sup>

<sup>1</sup> Brain Science Institute, Tamagawa University, Tokyo 194-8610, Japan

<sup>2</sup> TBWA\HAKUHODO, Tokyo 105-0023, Japan

<sup>3</sup> Mathematical Informatics Laboratory, Nara Institute of Science and Technology, Nara 630-0192, Japan

<sup>4</sup> Neural Computation Unit, Okinawa Institute of Science and Technology, Okinawa 904-0495, Japan

<sup>5</sup> ATR Brain Information Communication Research Lab, Kyoto 619-0288, Japan

\*Correspondence: [ferminalan@gmail.com](mailto:ferminalan@gmail.com) (A.S.R.F), [doya@oist.jp](mailto:doya@oist.jp) (K.D.)

## 23 Supplementary Results

24

25 Analysis of Behavioral Data in the Training Session

### 26 REWARD SCORE

27 The reward score of KM-SG sets to be retested in the fMRI session as Condition 3 (Supplementary  
28 Figure 2A) was analyzed with a two-way ANOVA having as factors start time condition and trial block.  
29 This analysis revealed a significant effect of start time,  $F(1,2154) = 31.21$ ,  $p < 0.00001$ , a significant  
30 effect of trial block,  $F(2,2154) = 206.39$ ,  $p < 0.00001$ , and a significant interaction effect between start  
31 time condition and trial block,  $F(2,2154) = 5.72$ ,  $p = 0.003$ . Sheffe's post hoc test showed that the mean  
32 reward score with a delayed start ( $M = 80.72$ ,  $SE = 1.1088$ ) was significantly higher than the reward  
33 score with an immediate start ( $M = 72.1$ ,  $SE = 1.1088$ ),  $p < 0.0001$ , and that reward score in trial block 3  
34 ( $M = 92.2986$ ,  $SE = 1.3365$ ) was significantly greater than the reward score in trial block 2 ( $M =$   
35  $81.8708$ ,  $SE = 1.3365$ ) and trial block 1 ( $M = 92.29886$ ,  $SE = 1.3365$ ),  $p < 0.00001$ . Supplementary  
36 Figure 2B shows the percentage of successful goal achievement, which includes suboptimal and optimal  
37 trials, and Supplementary Figure 2C shows the percentage of optimal goal attainment trials.

38

### 39 OVER-STEP

40 We estimated the number of excessive keystrokes that subjects executed to reach the goal  
41 (Supplementary Figure 2D). Two-way ANOVA showed a significant effect of start time,  $F(1,2154) =$   
42  $5.92$ ,  $p < 0.0151$ , and of trial block,  $F(1,2154) = 139.88$ ,  $p < 0.00001$ , but failed to find any significance  
43 interaction between start time and trial block,  $F(1,2154) = 0.24$ ,  $p = 0.7858$ . Scheffe's post hoc test  
44 showed that subjects were less efficient with an immediate start ( $M = 1.3043$ ,  $SE = 0.0602$ ) than with a  
45 delayed start ( $M = 1.0972$ ,  $SE = 0.0601$ ),  $p < 0.05$ , and that the mean number of excess keystrokes was

46 larger in trial block 1 ( $M = 2.1842$ ,  $SE = 0.0738$ ) than in trial block 2 ( $M = 0.8959$ ,  $SE = 0.0737$ ; Block  
47 3:  $M = 0.5222$ ,  $SE = 0.0737$ ).

48

#### 49 REACTION TIME

50 The analysis of the reaction time (Supplementary Figure 2E) using a two-way ANOVA showed a  
51 significant effect of start time condition,  $F(1,2154) = 1320.86$ ,  $p < 0.00001$  and trial block,  $F(2,2154) =$   
52  $5.52$ ,  $p = 0.0041$ . The ANOVA failed to find an interaction between the start time and trial block,  
53  $F(2,2154) = 1.68$ ,  $p > 0.05$ . The Scheffe's post hoc test revealed that the mean reaction time with a  
54 delayed start ( $M = 0.560s$ ,  $SE = 0.0179$ ) was faster than the reaction time with an immediate start ( $M =$   
55  $1.47s$ ,  $SE = 0.0179$ ),  $p < 0.00001$ , and reaction time decreased significantly across trial blocks with the  
56 reaction time in block 1 longer than ( $M = 1.06$ ,  $SE = 0.0219$ ) in block 3 ( $M = 0.9252$ ,  $SE = 0.0219$ ),  $p <$   
57  $0.05$ .

58

#### 59 EXECUTION TIME

60 Trial block had a significant effect on execution time (Supplementary Figure 2F),  $F(2,2153) = 439.96$ ,  $p$   
61  $< 0.00001$ , but start time did not,  $F(1,2153) = 1.26$ ,  $p = 0.2617$ . No interaction was found between start  
62 time and trial block,  $F(2,2154) = 0.39$ ,  $p = 0.6738$ . Scheffe's post hoc test revealed a significant decrease  
63 in execution time across trial blocks with a longer execution time in trial block 1 ( $M = 3.66$ ,  $SE = 0.04$ )  
64 than in trial block 2 ( $M = 2.29$ ,  $SE = 0.04$ ) and trial block ( $M = 1.72$ ,  $SE = 0.04$ ).

65

66 Analysis of Behavioral Data in the Test Session

#### 67 REWARD SCORE

68 We merged data of subjects in all three groups and carried out the statistical analysis with the null  
69 hypothesis of no significant difference in the mean reward score among the three task conditions. A  
70 four-way ANOVA found no effect of group condition,  $F(2,3204) = 2.74$ ,  $p = 0.0649$ . The analysis found  
71 a significant effect of task condition,  $F(2,3204) = 186.54$ ,  $p < 0.0001$ , start time condition,  $F(1,3204) =$   
72  $131.64$ ,  $p < 0.0001$ , and trial block,  $F(1,3204) = 126.09$ ,  $p < 0.0001$ . No two-way interaction effects  
73 were found between group and test conditions,  $F(4,3204) = 1.95$ ,  $p = 0.0999$ , or between group and start  
74 conditions,  $F(2,3204) = 0.54$ ,  $p = 0.5803$ . Significant two-way interactions were found between group  
75 and trial block conditions,  $F(2,3204) = 5.7$ ,  $p = 0.0034$ , test and start time conditions,  $F(2,3204) = 20.13$ ,  
76  $p < 0.0001$ , test and trial block conditions,  $F(2,3204) = 25.96$ ,  $p < 0.0001$ , and start time and trial block  
77 conditions,  $F(1,3204) = 12.55$ ,  $p = 0.0004$ . No three-way interaction effects were found for group x test  
78 x start time conditions,  $F(4,3204) = 0.25$ ,  $p = 0.9124$ , for group x test x trial block,  $F(4,3204) = 1.7$ ,  $p =$   
79  $0.1467$ , or for group x start x trial block conditions,  $F(2,3204) = 0.06$ ,  $p = 0.9397$ . Significant three-way  
80 interaction effects were found for test x start time x trial block conditions,  $F(2,3204) = 4.33$ ,  $p = 0.0133$ .  
81 No four way interaction effects were found,  $F(4,3204) = 1.21$ ,  $p < 0.3037$ .

82

83 Scheffe's post hoc test ( $p < 0.00001$ ) showed that the overall reward score in Condition 1 ( $M = 64.03$ ,  
84  $SE = 1.08$ ) was significantly smaller than that of Condition 2 ( $M = 72.77$ ,  $SE = 0.94$ ), and that the  
85 reward score of Condition 3 ( $M = 96.77$ ,  $SE = 1.33$ ) was the largest. Scheffe's post hoc test showed no  
86 significant increase in the reward score of Condition 3 across trial blocks (block 1:  $M = 96.70$ ,  $SE =$   
87  $1.88$ ; block 2:  $M = 96.84$ ,  $SE = 1.88$ ,  $p > 0.05$ ), whereas a significant increase was observed in  
88 Condition 1 (block 1:  $M = 52.84$ ,  $SE = 1.54$ ; block 2:  $M = 75.22$ ,  $SE = 1.54$ ,  $p < 0.00001$ ) and Condition  
89 2 (block 1:  $M = 61.97$ ,  $SE = 1.33$ ; block 2:  $M = 83.56$ ,  $SE = 1.33$ ,  $p < 0.00001$ ). The post hoc test also

90 showed that the average reward score in Condition 2 was significantly higher than in Condition 1 in trial  
91 blocks 1 ( $p < 0.0013$ ) and 2 ( $p < 0.005$ ).

92

93 We investigated in detail the effect of immediate and delayed starts on the ability of subjects to plan and  
94 execute successful action sequences. Scheffe's post hoc test showed a significant effect of start time on  
95 the reward score of Condition 1 (immediate:  $M = 55.52$ ,  $SE = 1.54$ ; delay:  $M = 72.53$ ,  $SE = 1.54$ ,  $p <$   
96  $0.00001$ ), Condition 2 (immediate:  $M = 60.56$ ,  $SE = 1.33$ ; delay:  $M = 84.97$ ,  $SE = 1.33$ ,  $p < 0.00001$ ),  
97 but no significant difference in Condition 3 (immediate:  $M = 94.94$ ,  $SE = 1.88$ ; delay:  $M = 98.61$ ,  $SE =$   
98  $1.88$ ,  $p = 0.8645$ ). Post hoc analysis revealed that the reward score in Condition 2 under a delayed start  
99 was significantly larger in relation to Condition 1,  $p < 0.001$ , but no difference was found between the  
100 two conditions for performances with an immediate start,  $p > 0.05$ .

101

102 The benefit of the delayed start on reward score was further investigated by calculating the reward gain,  
103 defined as the difference between the reward score of the delayed- and immediate-start trials for each  
104 KM-SG set. The reward gain was first computed individually and then taken to a group analysis and  
105 tested with a two-way ANOVA with task condition and trial block as factors. This analysis showed a  
106 significant effect of task condition,  $F(2,1614) = 25.53$ ,  $p < 0.00001$ , trial block,  $F(1,1614) = 15.92$ ,  $p <$   
107  $0.0001$  and a two-factor interaction,  $F(2,1614) = 5.49$ ,  $p = 0.0042$ . A post-hoc analysis also revealed that  
108 the overall reward gain was larger in Condition 2 ( $M = 24.40$ ,  $SE = 1.67$ ,  $p = 0.0118$ ) than in Condition  
109 1 ( $M = 17.01$ ,  $SE = 1.93$ ) and the reward gain in Condition 3 ( $M = 3.66$ ,  $SE = 2.37$ ) was the smallest  
110 (comparison with condition 1:  $p < 0.00001$ ; comparison with condition 2:  $p < 0.00001$ ). The post hoc  
111 analysis also showed that the difference in reward gain was significant between Conditions 1 and 2 in  
112 block 1 ( $p = 0.0162$ ), but not in block 2 ( $p = 0.9662$ ). While no significant decrease was observed in the

113 reward gain between trial blocks for Condition 1 ( $p = 0.1262$ ), a significant decrease was observed in  
114 Condition 2 ( $p < 0.00001$ ).

115

116 The beneficial effect of the delay was also estimated by calculating the improvement in successful trials  
117 (suboptimal + optimal trials) and in optimal trials (reward score = 100). Both measures were estimated  
118 similarly to the estimation of the reward score improvement. For both measures the gain was first  
119 computed individually and then taken to a group analysis and tested with a two-way ANOVA with task  
120 condition and trial block as factors. For the improvement in successful trials, this analysis found no  
121 significant effect of trial block,  $F(1,1614) = 2.43$ ,  $p = 0.1191$ , or for the interaction between task  
122 condition and trial block,  $F(2,1614) = 2.54$ ,  $p < 0.0795$ . A significant effect was found for task condition,  
123  $F(2,1614) = 110.85$ ,  $p < 0.00001$ . Scheffe's post hoc test found a significant difference ( $p < 0.00001$ ) in  
124 improvement between Condition 1 ( $M = 0.2183$ ,  $SE = 0.0129$ ) and Condition 2 ( $M = 0.3196$ ,  $SE =$   
125  $0.0112$ ), and with Condition 3 ( $M = 0.0316$ ,  $SE = 0.0158$ ) having the least improvement compared with  
126 Condition 1 ( $p < 0.00001$ ) and Condition 2 ( $p < 0.00001$ ). The improvement in Condition 2 (block 1:  $M$   
127  $= 0.3537$ ,  $SE = 0.0158$ ; block 2:  $M = 0.2854$ ,  $SE = 0.0158$ ) was significantly larger than the  
128 improvement in Condition 1 (block 1:  $M = 0.2278$ ,  $SE = 0.0182$ ; block 2:  $M = 0.2089$ ,  $SE = 0.0182$ ) in  
129 both trial blocks (block 1:  $p < 0.00001$ ; block 2:  $p = 0.0232$ ). While no significant difference was found  
130 in the improvement of Condition 1 between trial blocks ( $p = 1$ ), a significant difference was found in  
131 Condition 2 ( $p = 0.034$ ). No significant difference in improvement was found in Condition 3 between  
132 trial blocks (block 1:  $M = 0.0243$ ,  $SE = 0.0223$ ; block 2:  $M = 0.0389$ ,  $SE = 0.0223$ ;  $p = 1$ ).

133

134 The two-way ANOVA of the improvement in optimal trials found a significant effect of task condition,  
135  $F(2,1614) = 64.85$ ,  $p = 0.00001$ , but no significant effect of trial block,  $F(1,1614) = 0.07$ ,  $p = 0.7844$ ,

136 and no significant interaction,  $F(2,1614) = 0.14$ ,  $p = 0.8696$ . Scheffe's post hoc analysis found that the  
137 improvement in optimal trials was significantly larger in Condition 2 ( $M = 0.2706$ ,  $SE = 0.0114$ ) than in  
138 Condition 1 ( $M = 0.1297$ ,  $SE = 0.0131$ ),  $p < 0.00001$ , and that Condition 3 ( $M = 0.0647$ ,  $SE = 0.0161$ )  
139 had the least improvement (comparison with Condition 1:  $p = 0.0075$ ; comparison with Condition 2:  $p <$   
140  $0.00001$ ). The post hoc analysis also found that the improvement in Condition 2 (block 1:  $M = 0.2713$ ,  
141  $SE = 0.0161$ ; block 2:  $M = 0.2699$ ,  $SE = 0.0161$ ) was significantly larger than in Condition 1 (block 1:  
142  $M = 0.1272$ ,  $SE = 0.0186$ ; block 2:  $M = 0.1323$ ,  $SE = 0.0186$ ) in both trial blocks (block 1:  $p < 0.00001$ ;  
143 block 2:  $p < 0.00001$ ).

144

145 Next, we classified the trials into three types based on their reward score (error trials, reward score = 0,  
146 suboptimal trials,  $0 < \text{reward score} < 100$ , and optimal trials, reward score = 100), and performed a  
147 three-way ANOVA with task condition, start time condition and trial type as main factors. ANOVA  
148 demonstrated a significant effect for trial type,  $F(2,3204) = 120.36$ ,  $p < 0.00001$ , interaction effect for  
149 task condition and trial type,  $F(4,3204) = 205.97$ ,  $p < 0.00001$ , start time condition and trial type,  
150  $F(2,3204) = 97.15$ ,  $p < 0.00001$ , and three way interaction,  $F(4,3204) = 15.85$ ,  $p < 0.00001$ . Scheffe's  
151 post hoc test showed that the overall error rate in Condition 1 ( $M = 0.32$ ,  $SE = 0.0125$ ) was significantly  
152 higher than in Condition 2 ( $M = 0.23$ ,  $SE = 0.0108$ ,  $p = 0.0006$ ), and Condition 3 had the lowest error  
153 rate ( $M = 0.02$ ,  $SE = 0.0153$ ; comparison with Condition 1:  $p < 0.00001$ ; comparison with Condition 2:  
154  $p < 0.00001$ ). Furthermore, the post hoc test also showed the rate of optimal trials in Condition 2 ( $M =$   
155  $0.54$ ,  $SE = 0.0108$ ) was significantly higher than in Condition 1 ( $M = 0.46$ ,  $SE = 0.0125$ ),  $p = 0.0053$ .  
156 The latter effect was also significant ( $p = 0.0069$ ) in delayed-start trials between Condition 2 ( $M = 0.65$ ,  
157  $SE = 0.0153$ ) and Condition 1 ( $M = 0.52$ ,  $SE = 0.0177$ ).

158

159 Since there were three groups of subjects performing the same task conditions, we further conducted a  
160 post hoc analysis to seek for significant differences between subject groups during the same task  
161 condition (Supplementary Figure). Scheffe's post hoc test did not find any significant difference  
162 between groups regardless of condition (Condition 1: group 1 x group 2:  $p = 0.4267$ ; group 1 x group 3:  
163  $p = 0.4296$ ; group 2 x group 3:  $p = 1$ ; Condition 2: group 1 x group 2:  $p = 1$ ; group 1 x group 3:  $p =$   
164  $0.8896$ ; group 2 x group 3:  $p = 0.9364$ ; Condition 3: group 1 x group 2:  $p = 0.9999$ ; group 1 x group 3:  
165  $p = 1$ ; group 2 x group 3:  $p = 1$ ).

166

167 The mean absolute deviation (MAD) was calculated on a trial-by-trial basis as a measure of variability  
168 of performance with reward score as the variable of interest. MAD was estimated for each subject  
169 separately for each KM-SG set and start time condition and then a group analysis was performed using  
170 three-way ANOVA, with task condition, start time condition and trial block as factors. This analysis  
171 revealed a significant effect of task condition,  $F(2,636) = 82.95$ ,  $p < 0.00001$ , start time,  $F(1,636) =$   
172  $27.52$ ,  $p < 0.00001$ , trial block,  $F(1,636) =$ ,  $p < 0.00001$ , and a two-way interaction effect for task  
173 condition and trial block,  $F(2,636) = 8.09$ ,  $p < 0.0003$ . No significant interaction effects were found for  
174 task condition and start condition,  $F(2,636) = 2.35$ ,  $p = 0.0964$ , start time and trial block,  $F(1,636) = 0.64$ ,  
175  $p = 0.4248$  or for a three-way interaction,  $F(2,636) = 0.15$ ,  $p = 0.8573$ . The post hoc test indicated that  
176 there was significantly higher variability in the reward score in Condition 1 ( $M = 24.64$ ,  $SE = 1.03$ ) than  
177 in Condition 2 ( $M = 20.96$ ,  $SE = 0.89$ ),  $p = 0.0199$ . Condition 3 ( $M = 4.41$   $SE = 1.27$ ) had the lowest  
178 variability (comparison with Condition 1:  $p < 0.00001$ ; comparison with Condition 2:  $p < 0.00001$ ).

179

180 EXCESS STEPS



181 A three-way ANOVA found a main effect of task condition,  $F(2,3228) = 109.92$   $p < 0.00001$ , trial block,  
182  $F(1,3228)=19.85$ ,  $p < 0.00001$ , two-way interaction effect for task condition and start time,  $F(1,3228) =$   
183  $2.88$ ,  $p < 0.05$ , and task condition and trial block,  $F(1,3228) = 6.19$ ,  $p = 0.0021$ . No other two-way or  
184 three-way interactions were found. Scheffe's post hoc test indicated that the average number of excess  
185 steps in Condition 1 ( $M = 1.75$ ,  $SE = 0.063$ ) was larger than in Condition 2 ( $M = 1.43$ ,  $SE = 0.054$ ),  $p =$   
186  $0.0006$  or Condition 3 ( $M = 0.3$ ,  $SE = 0.077$ ),  $p < 0.00001$ . Subjects in Condition 2 used more steps than  
187 in Condition 3 ( $p < 0.00001$ ). The number of excess steps did not differ between Condition 1 ( $M = 1.96$ ,  
188  $SE = 0.0892$ ) and Condition 2 ( $M = 1.74$ ,  $SE = 0.0773$ ) in trial block 1 ( $p = 0.6256$ ), but was  
189 significantly different in trial block 2 ( $p = 0.0264$ ) with the number of extra steps being larger in  
190 Condition 1 ( $M = 1.53$ ,  $SE = 0.0892$ ) than Condition 2 ( $M = 1.11$ ,  $SE = 0.0773$ ). The mean absolute  
191 deviation, as a measure of performance variability, was estimated separately for each subject, KM-SG  
192 set, and trial block, and was also analyzed in a three-way ANOVA with task condition, start time  
193 condition, and trial block as factors of interest. We found significant effect of test condition,  $F(2,636) =$   
194  $58.54$ ,  $p < 0.00001$ , effect of trial block,  $F(1,636) = 6.59$ ,  $p = 0.0105$ , and interaction effect between task  
195 condition and trial block,  $F(1,636) = 3.28$ ,  $p = 0.0382$ . Scheffe's post hoc analysis showed that subjects  
196 varied more in the number of extra steps employed in Condition 1 ( $M = 1.36$ ,  $SE = 0.0597$ ) than in  
197 Condition 2 ( $M = 1.14$ ,  $SE = 0.0517$ ),  $p = 0.0233$ , and Condition 3 ( $M = 0.36$   $SE = 0.0731$ ),  $p < 0.00001$ .  
198 Excess step variability was also higher in Condition 2 than in Condition 3 ( $p < 0.00001$ ). The  
199 comparison between trial blocks also showed no significant difference in extra step variability in  
200 Condition 1 (block 1:  $M = 1.50$ ,  $SE = 0.0845$ ; block 2:  $M = 1.21$ ,  $SE = 0.0845$ ;  $p = 0.3501$ ). On the other  
201 hand, a significant decrease in extra step variability occurred in Condition 2 (block 1:  $M = 1.32$ ,  $SE =$   
202  $0.0731$ ; block 2:  $M = 0.96$ ,  $SE = 0.0731$ ;  $p = 0.0339$ ). No significant difference in excess step variability

203 was observed in Condition 3 between trial blocks (block 1:  $M = 0.3233$ ,  $SE = 0.1034$ ; block 2:  $M = 0.41$ ,  
 204  $SE = 0.1034$ ;  $p = 0.9959$ ).

205

## 206 REACTION TIME

207 A three-way ANOVA on the reaction time with task condition, start time condition, and trial block as  
 208 main factors found a main effect of task condition,  $F(2,3228) = 72.85$ ,  $p < 0.00001$ , start time,  $F(1,3228)$   
 209  $= 2344.04$ ,  $p < 0.00001$ , and trial block,  $F(1,3228) = 24.12$ ,  $p < 0.00001$ . Significant two-way  
 210 interactions were found for task condition and start time,  $F(1,3228) = 16.34$ ,  $p < 0.00001$ , and a nearly  
 211 significant effect for task condition and trial block was observed  $F(2,3228) = 2.8$ ,  $p = 0.0611$ . No  
 212 interaction was found for start time and trial block,  $F(2,3228) = 0.4$ ,  $p = 0.5263$ , or for three-way  
 213 interaction,  $F(2,3228) = 1.1$ ,  $p = 0.3326$ .

214

215 Scheffe's post hoc test showed no significant difference in overall reaction time between Condition 1 ( $M$   
 216  $= 1.34$ ,  $SE = 0.0212$ ) and Condition 2 ( $M = 1.38$ ,  $SE = 0.0184$ ),  $p = 0.7136$ . This analysis found that the  
 217 average reaction time in Condition 3 ( $M = 1.01$ ,  $SE = 0.0260$ ) was significantly faster than in Conditions  
 218 1 and 2,  $p < 0.00001$ . Post hoc analysis also found a significantly slower reaction time in immediate- ( $M$   
 219  $= 1.86$ ,  $SE = 0.0180$ ) than in delayed-start trials ( $M = 0.63$ ,  $SE = 0.0180$ ),  $p < 0.00001$ , and a significant  
 220 decrease in reaction time between trial blocks (block 1:  $M = 1.31$ ,  $SE = 0.0180$ ; block 2:  $M = 1.18$ ,  $SE =$   
 221  $0.0180$ ),  $p < 0.0001$ . In immediate-start trials, the reaction time in Condition 3 ( $M = 1.5197$ ,  $SE =$   
 222  $0.0368$ ) was significantly faster than the reaction time in Condition 1 ( $M = 2.03$ ,  $SE = 0.03$ ;  $p <$   
 223  $0.00001$ ) and Condition 2 ( $M = 2.0504$ ,  $SE = 0.0260$ ;  $p < 0.00001$ ). Similarly, the reaction time in  
 224 Condition 3 ( $M = 0.5099$ ,  $SE = 0.0368$ ) in delayed-start trials was significantly faster than the reaction  
 225 time in Condition 1 ( $M = 0.6698$ ,  $SE = 0.03$ ;  $p < 0.0451$ ) and Condition 2 ( $M = 0.7157$ ,  $SE = 0.0260$ ;  $p$

226 < 0.00001). The reaction time in Condition 1 and Condition 2 did not differ between immediate- (p =  
227 0.9983) and delayed-start trials (p = 0.9311). No significant difference in reaction time was observed in  
228 Condition 1 between the immediate-start trial blocks 1 (M = 2.1110, SE = 0.0424) and 2 (M = 1.9490,  
229 SE = 0.0424), p = 0.2265, or between the delayed-start trial blocks 1 (M = 0.7429, SE = 0.0424) and 2  
230 (M = 0.5967, SE = 0.0424), p = 0.8776. Similarly, no significant difference in reaction time was  
231 observed in Condition 2 between the immediate-start trial blocks 1 (M = 2.1105, SE = 0.0368) and 2 (M  
232 = 1.9902, SE = 0.0368), p = 0.4661. No significant difference in reaction time was found between  
233 Condition 1 and 2 in trial block 1 (p = 1) and in trial block 2 (p = 0.9999). On the other hand, a  
234 significant difference in reaction time was observed in Condition 2 between the delayed-start trial blocks  
235 1 (M = 0.8409, SE = 0.0368) and 2 (M = 0.5906, SE = 0.0368), p = 0.0169.

236

## 237 EXECUTION TIME

238 The three-way ANOVA with task conditions, start time condition and trial block as main factors found a  
239 significant main effect of task condition,  $F(2,3228) = 325.86$ ,  $p < 0.00001$ , start time,  $F(1,3228) = 4.66$ ,  $p$   
240  $= 0.0309$ , and trial block,  $F(1,3228) = 170.16$ ,  $p < 0.00001$ , and a two-way interaction between task  
241 condition and trial block,  $F(1,3228) = 19.06$ ,  $p < 0.00001$ . No significant effects were found for other  
242 interactions. Scheffe's post hoc test showed the average execution time in Condition 1 (M = 3.173, SE =  
243 0.0349) was significantly longer than in Condition 2 (M = 2.9211, SE 0.0302),  $p < 0.00001$  and in  
244 Condition 3 (M = 1.820, SE = 0.0427),  $p < 0.00001$ . Execution time in Condition 2 was also  
245 significantly longer than in Condition 3 ( $p < 0.00001$ ). During immediate-start trials, execution times in  
246 Condition 1 (M = 3.0650, SE = 0.0494) and Condition 2 (M = 2.9044, SE = 0.0427) did not differ  
247 significantly (p = 0.3020). However, a significant difference in execution time was observed between  
248 Condition 1 (M = 3.2826, SE = 0.0494) and Condition 2 (M = 2.9377, SE = 0.0427) with a delayed start

249 ( $p < 0.00001$ ). Execution time decreased significantly in Condition 1 between immediate start-trial  
250 blocks (block 1:  $M = 3.3538$ ,  $SE = 0.0698$ ; block 2:  $M = 2.7761$ ,  $SE = 0.0698$ ;  $p < 0.00001$ ) and  
251 delayed-start trial blocks (block 1:  $M = 3.7106$ ,  $SE = 0.0698$ ; block 2:  $M = 2.8545$ ,  $SE = 0.0698$ ;  $p <$   
252  $0.00001$ ). A significant decrease in execution time across trial blocks was also observed in Condition 1  
253 between immediate-start trial blocks (block 1:  $M = 3.288$ ,  $SE = 0.0605$ ; block 2:  $M = 2.55$ ,  $SE = 0.0605$ ;  
254  $p < 0.00001$ ) and delayed-start trial blocks (block 1:  $M = 3.3554$ ,  $SE = 0.0605$ ; block 2:  $M = 2.5200$ ,  $SE$   
255  $= 0.0605$ ;  $p < 0.002$ ). No significant differences in the execution time were observed in Condition 3  
256 across immediate- (block 1:  $M = 1.8827$ ,  $SE = 0.0855$ ; block 2:  $M = 1.7377$ ,  $SE = 0.0855$ ;  $p = 0.9997$ )  
257 or delayed-start trial blocks (block 1:  $M = 1.9113$ ,  $SE = 0.0855$ ; block 2:  $M = 1.7510$ ,  $SE = 0.0855$ ;  $p =$   
258  $0.9992$ ).

259

260 A MAD analysis using the same procedures as described in the analysis of reward score was carried out  
261 to examine performance variability in execution time. Three-way ANOVA with repeated measures  
262 revealed a significant effect of task condition,  $F(2,48)=112.54$ ,  $p < 0.001$ , start time,  $F(1,48)=37.89$ ,  $p <$   
263  $0.001$ , trial block,  $F(1,48)=10.62$ ,  $p < 0.005$ , and significant two-way interaction for task condition and  
264 start time,  $F(2,48)=6.64$ ,  $p < 0.005$ , and test condition and trial block,  $F(2,48)=8.95$ ,  $p < 0.001$ . Post hoc  
265 analysis showed higher variability in execution time in Condition 1 ( $M = 1065$ ,  $SE = 47$ ) than in  
266 Condition 2 ( $M = 945$ ,  $SE = 28$ ) and Condition 3 ( $M = 553$ ,  $SE = 30$ ).

267

268

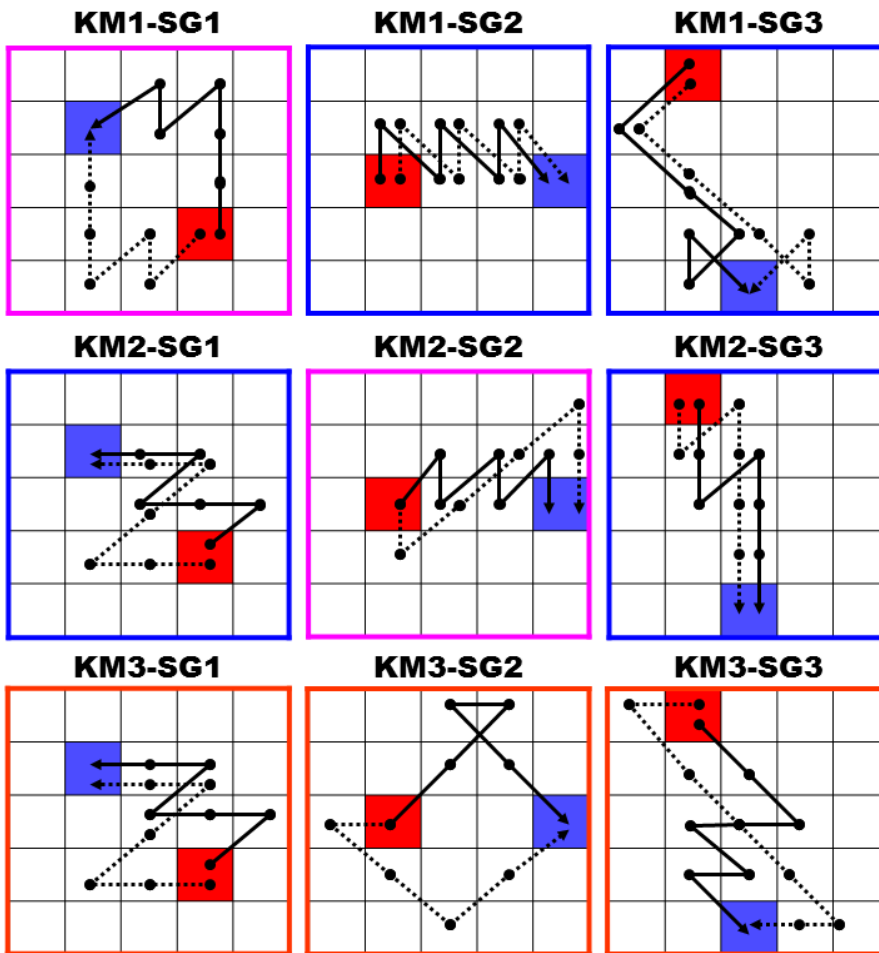

269  
 270 Supplementary Figure S1: Examples of optimal paths performed for the 3x3 combinations of KMs and  
 271 SGs in the test session by two representative subjects (dotted lines: subject 02; continuous line: subject  
 272 16). The color coded grids represent the task conditions to which each KM-SG combination belonged:  
 273 Condition 1 (orange), Condition 2 (blue) and Condition 3 (pink).

274

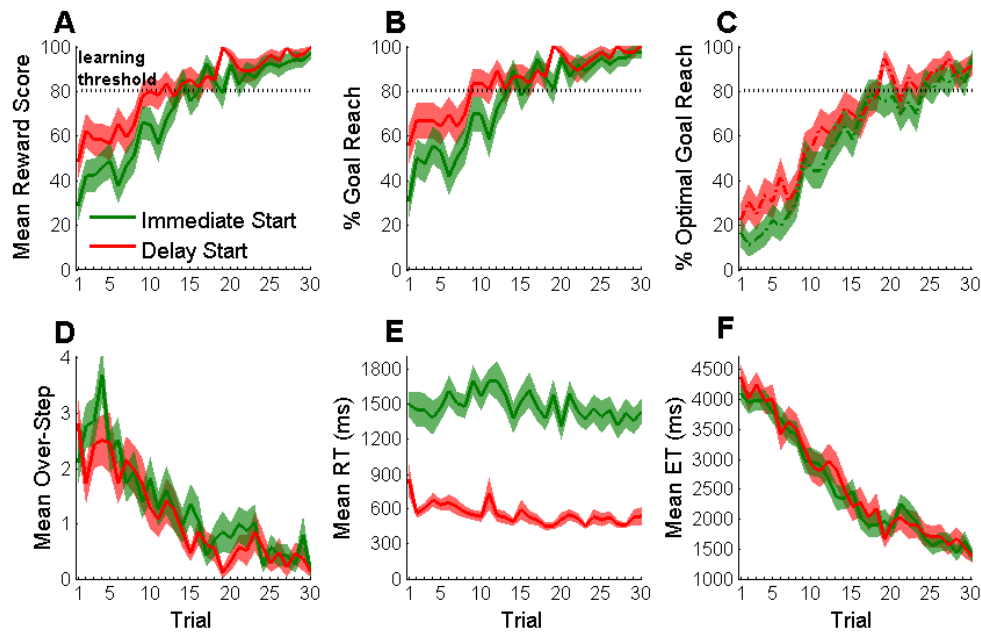

275

276 Supplementary Figure S2: Behavioral performance in the training session. A: average reward score. B:

277 average percentage of trials in which subjects successfully reached the goal position. C: average

278 percentage of trials in which subjects reached the goal by performing optimal (shortest path) action

279 sequences. D: average number of steps performed above the optimal sequence size to reach the goal

280 position. E: average reaction time (RT). F: average execution time (ET). The ET was measured as the

281 time between the first and last keystrokes in a successful action sequence. Behavior shown in D, E and F

282 was analyzed only for successful trials.

283

284

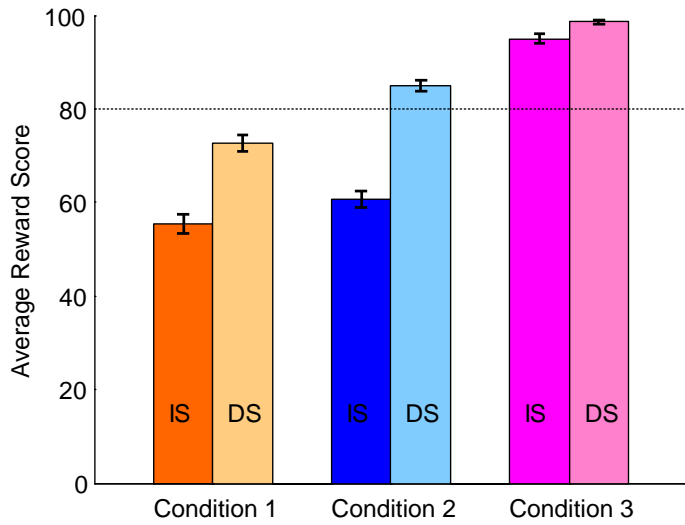

285

286 Supplementary Figure S3: Average reward score for each task condition for immediate-start (IS) and  
287 delayed-start (DS) trials. Condition 1: new KM; Condition 2: learned KM with new SG positions;  
288 Condition 3: learned KM-SG sets.

289

290

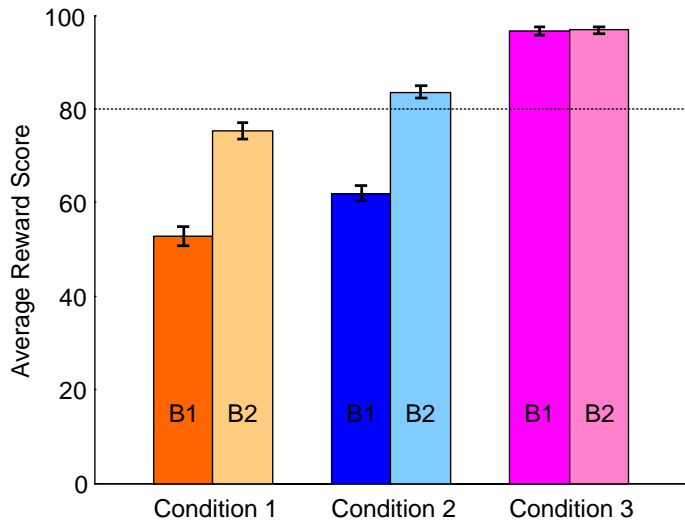

291

292 Supplementary Figure S4: Average reward score for each task condition separated by trial block (B1:  
293 trial block 1; B2: trial block 2), each block composed of 10 trials for each task condition. Condition 1:  
294 new KM; Condition 2: learned KM with new SG positions; Condition 3: learned KM-SG sets. While the  
295 reward score performance in Condition 3 was highly accurate and not significantly different between  
296 trial blocks ( $p = 0.86$ ), the reward score significantly increased in trial block 2 for Conditions 1 ( $p <$   
297  $0.0001$ ) and 2 ( $p < 0.0001$ ).

298



299

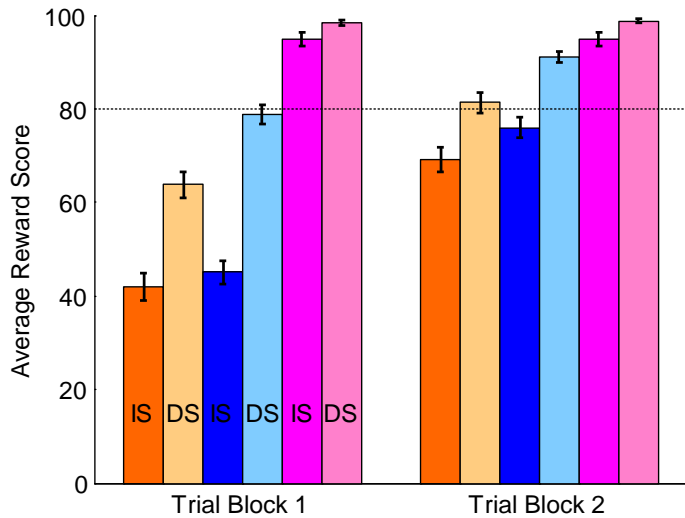

300

301 Supplementary Figure S5: Average reward score for each task condition, separated by trial block and  
 302 immediate-start (IS) and delayed-start (DS) trials. The ANOVA analysis revealed a significant increase  
 303 in the reward scores of Conditions 1 and 2 across trials blocks, indicating that subjects could  
 304 successfully improve their performance as learning went on. Conversely, no significant differences in  
 305 performance across trial blocks were observed in Condition 3. Condition 1 (dark orange and light orange  
 306 bars): new KM; Condition 2 (dark blue and light blue bars): learned KM with new SG positions;  
 307 Condition 3 (dark purple and light purple bars): learned KM-SG sets.

308

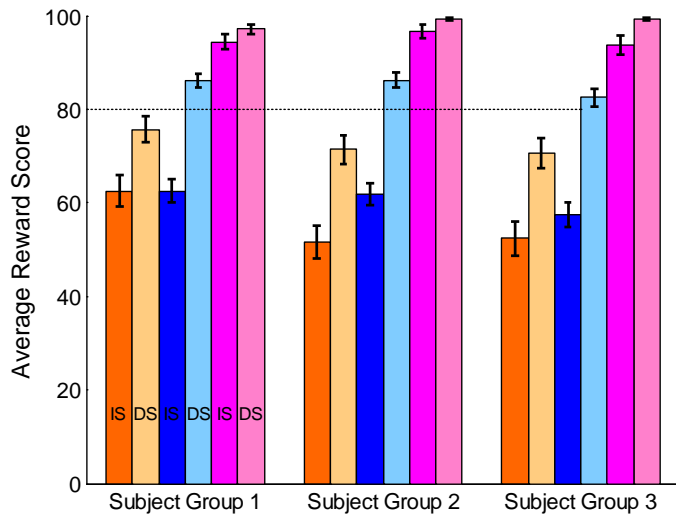

309

310 Supplementary Figure S6: Average reward score for each task condition, separated start time condition

311 (immediate-start: IS; delayed-start: DS) and subject group. The ANOVA did not find significant

312 differences in performance among the three subject groups, suggesting a comparable effect of task

313 condition on reward score regardless of which KM-SG sets were assigned for the subjects under each

314 task condition.

315

316

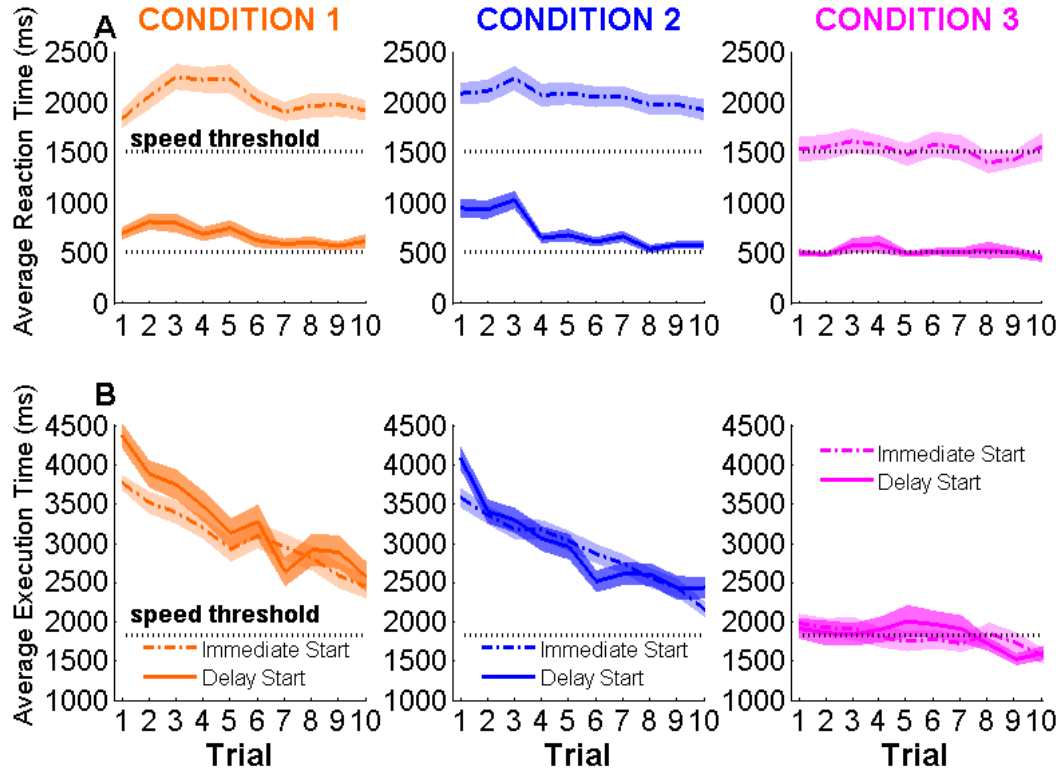

317

318 Supplementary Figure S7: Performance speed measures in the fMRI session, separated for each task

319 condition (Condition 1: left orange panels; Condition 2: middle blue panels; Condition 3: right purple

320 panels), and for immediate start (colored broken lines) and delayed-start (continuous lines) trials. **A (top**321 **row)**: Average reaction time (ms). The top and bottom black dotted lines represent the overall mean322 reaction time in Condition 3 in delayed-start and immediate-start trials, respectively. **B (bottom row)**:

323 Average execution time (ms). The black dotted line represents the overall mean execution time in

324 Condition 3.

325

326

327

328

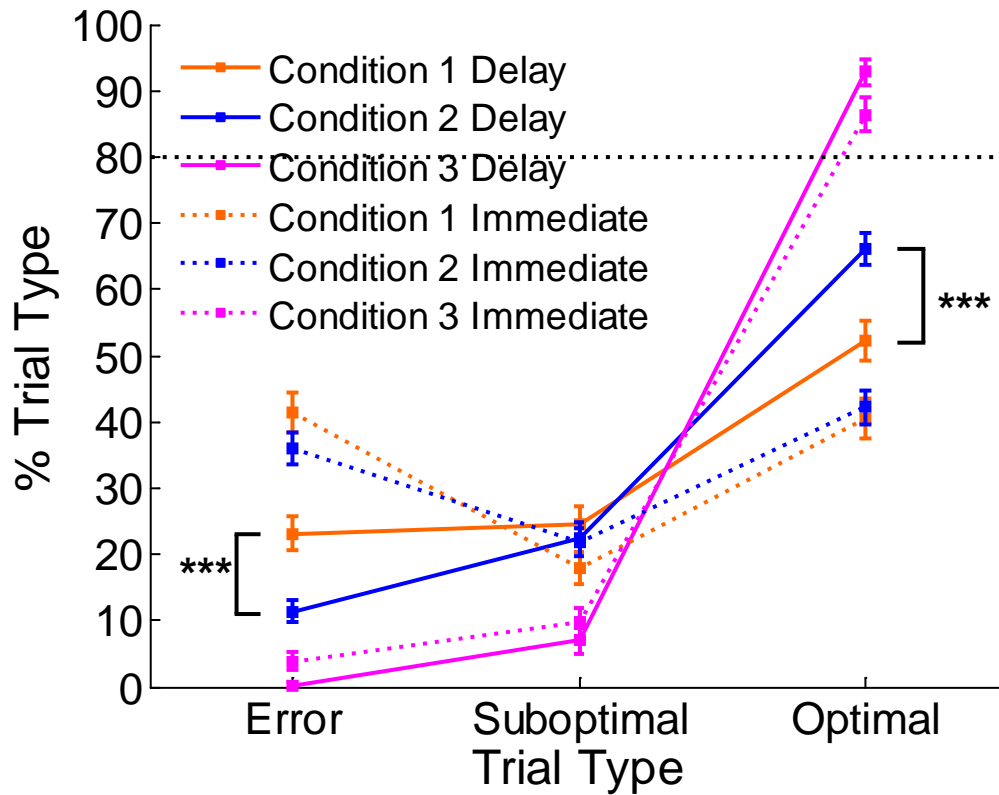

329

330 Supplementary Figure S8: Behavior performance in the fMRI test session separated by trial type. Trials

331 were classified as error (reward score = 0), suboptimal ( $0 < \text{reward score} < 100$ ) and optimal (reward

332 score = 100) based on the reward scored subjects received at the end of a trial.

333

334

335

336

337

338 Table S1. Comparison of neural activity in conditions requiring learning (Condition 1 and Condition 2)  
 339 versus automatic behavior (Condition 3). Related to results in Figure 4.

| Brain region                                                                              | Hemi | Coordinates<br>[x,y,z] |     |     | T-value | P<br>(FWE) | SVC<br>(FWE) | P (unc.) |
|-------------------------------------------------------------------------------------------|------|------------------------|-----|-----|---------|------------|--------------|----------|
| <b>Subtraction Condition 1 &gt; Condition 3 of results presented in Figure 4A, 4C, 4D</b> |      |                        |     |     |         |            |              |          |
| DLPFC                                                                                     | L    | -39                    | 23  | 31  | 6.11    | 0.05       |              | 0.0001   |
| Inferior parietal cortex                                                                  | R    | 39                     | -49 | 52  | 6.08    | 0.0001     |              | 0.0001   |
| Precuneus                                                                                 | R    | 12                     | -61 | 55  | 5.86    |            | 0.0001       | 0.0001   |
| Supramarginal                                                                             | R    | 54                     | -28 | 40  | 5.47    |            | 0.0001       | 0.0001   |
| Anterior putamen                                                                          | R    | 15                     | 14  | -2  | 5.91    | 0.003      |              | 0.0001   |
| Anterior caudate nucleus                                                                  | R    | 9                      | 17  | 7   | 5.33    |            | 0.0001       | 0.0001   |
| Medial globus pallidus                                                                    | L    | -12                    | -4  | -5  | 5.79    | 0.4        | 0.004        | 0.0001   |
| Superior frontal gyrus                                                                    | R    | 24                     | 5   | 52  | 5.79    | 0.0001     |              | 0.0001   |
| Ventrolateral premotor cortex                                                             | R    | 45                     | 11  | 19  | 5.77    | 0.005      |              | 0.0001   |
| Dorsal premotor cortex                                                                    | L    | -18                    | 11  | 43  | 5.73    | 0.001      |              | 0.0001   |
| Middle frontal gyrus                                                                      | L    | -24                    | 8   | 58  | 5.28    |            | 0.0001       | 0.0001   |
| SMA                                                                                       | L    | -3                     | 20  | 49  | 4.61    |            | 0.002        | 0.0001   |
| Anterior caudate nucleus                                                                  | L    | -12                    | 14  | 1   | 5.7     | 0.028      |              | 0.0001   |
| Inferior parietal cortex                                                                  | L    | -45                    | -49 | 46  | 5.47    | 0.001      |              | 0.0001   |
| Precentral gyrus                                                                          | L    | -45                    | 2   | 40  | 5.12    | 0.1        | 0.004        | 0.0001   |
| Inferior temporal gyrus                                                                   | L    | -51                    | -55 | -8  | 4.21    | 0.7        | 0.009        | 0.0001   |
| <b>Subtraction Condition 2 &gt; Condition 3 of results presented in Figure 4B, 4C, 4D</b> |      |                        |     |     |         |            |              |          |
| Ventrolateral premotor cortex                                                             | R    | 51                     | 8   | 25  | 7.82    | 0.002      |              | 0.0001   |
| Inferior parietal cortex                                                                  | R    | 42                     | -43 | 46  | 7.15    | 0.0001     |              | 0.0001   |
| Middle occipital gyrus                                                                    | R    | 39                     | -67 | 25  | 6.20    |            | 0.001        | 0.0001   |
| Supramarginal                                                                             | R    | 54                     | -28 | 42  | 5.96    |            | 0.001        | 0.0001   |
| DLPFC                                                                                     | L    | -48                    | 32  | 34  | 6.98    | 0.0001     |              | 0.0001   |
| Precentral gyrus                                                                          | L    | -45                    | 2   | 40  | 5.99    |            | 0.001        | 0.0001   |
| Anterior caudate nucleus                                                                  | L    | -12                    | 11  | 1   | 6.28    | 0.0001     |              | 0.0001   |
| Anterior caudate nucleus                                                                  | R    | 12                     | 11  | 1   | 6.04    |            | 0.0001       | 0.0001   |
| Superior frontal gyrus                                                                    | R    | 24                     | 8   | 55  | 6.02    | 0.0001     |              | 0.0001   |
| Superior frontal gyrus                                                                    | L    | -21                    | 8   | 61  | 6.01    | 0.0001     |              | 0.0001   |
| SMA                                                                                       | L    | -6                     | 23  | 49  | 5.99    |            | 0.001        | 0.0001   |
| Anterior cerebellum                                                                       | L    | -33                    | -46 | -29 | 5.63    | 0.1        | 0.002        | 0.0001   |
| Inferior temporal gyrus                                                                   | L    | -54                    | -58 | -11 | 5.48    | 0.49       | 0.005        | 0.0001   |
| DLPFC                                                                                     | R    | 45                     | 38  | 19  | 5.27    | 0.1        | 0.001        | 0.0001   |
| Inferior frontal gyrus                                                                    | L    | -36                    | 44  | 1   | 5.02    | 0.6        | 0.007        | 0.0001   |
| Inferior precuneus                                                                        | R    | 15                     | -55 | 19  | 4.76    | 0.6        | 0.006        | 0.0001   |
| Superior precuneus                                                                        | L    | -9                     | -58 | 58  | 5.06    |            | 0.0001       | 0.0001   |

340 P (FWE): statistical test whole-brain corrected for multiple comparison with threshold at the cluster  
 341 level.

342 SVC (FWE): small volume correction (SVC) with sphere radius of 10 mm corrected for multiple  
 343 comparisons with threshold at the cluster level.

344 P (unc.): statistical test whole-brain uncorrected.

345 Hemi: hemisphere – L (left), R (right).

346 -DLPFC: dorsolateral prefrontal cortex; SMA: supplementary motor area.

347

348

349

350

351

352

353

354

355

356

357

358

359

360

361

362

363

364

365

366

367

368

369

370

371

372

373

374

375

376 Table S2. Comparison of neural activity between Conditions 1 (value-based strategy) and Condition 2  
 377 (model-based strategy). Related to results in Figure 5.

| Brain region                                                                      | Hemi | Coordinates<br>[x,y,z] |     |     | T-value | P<br>(FWE) | SVC<br>(FWE) | P (unc.) |
|-----------------------------------------------------------------------------------|------|------------------------|-----|-----|---------|------------|--------------|----------|
| <b>Subtraction Condition 1 &gt; Condition 2 of results presented in Figure 5A</b> |      |                        |     |     |         |            |              |          |
| Anterior prefrontal cortex                                                        | R    | 9                      | 56  | -17 | 4.66    | 0.025      |              | 0.001    |
| Ventromedial OFC                                                                  | R    | 6                      | 26  | -17 | 4.56    | 0.015      |              | 0.001    |
| Anterior caudate nucleus                                                          | R    | 12                     | 20  | 4   | 3.17    | 0.023      |              | 0.001    |
| Precuneus                                                                         | L    | -12                    | -43 | 52  | 4.51    |            | 0.016        | 0.001    |
| Supramarginal                                                                     | L    | -42                    | -49 | 19  | 4.27    | 0.023      |              | 0.001    |
| Supramarginal                                                                     | R    | 51                     | -31 | 34  | 4.14    |            | 0.028        |          |
| Postcentral                                                                       | L    | -66                    | -13 | 25  | 4.10    |            | 0.030        | 0.001    |
| Dorsal premotor cortex                                                            | L    | -15                    | 17  | 61  | 4.06    |            | 0.032        | 0.001    |
| Dorsal premotor cortex                                                            | R    | 21                     | 17  | 58  | 3.71    |            | 0.045        | 0.001    |
| Cerebellum Crus 1                                                                 | L    | -27                    | -82 | -29 | 3.71    |            | 0.045        | 0.001    |
| Anterior caudate                                                                  | L    | -9                     | 17  | -8  | 4.63    | 0.009      |              | 0.001    |
| DLPFC                                                                             | R    | 39                     | 35  | 46  | 4.61    | 0.01       |              | 0.001    |
| Postcentral                                                                       | R    | 54                     | -13 | 31  | 4.24    |            | 0.020        | 0.001    |
| Middle temporal gyrus                                                             | R    | 51                     | -76 | 16  | 4.18    |            | 0.023        | 0.001    |
| <b>Subtraction Condition 2 &gt; Condition 1 of results presented in Figure 5B</b> |      |                        |     |     |         |            |              |          |
| Superior medial PFC                                                               | R    | 9                      | 47  | 31  | 5.51    | 0.001      |              | 0.001    |
| Superior medial PFC                                                               | L    | -15                    | 32  | 40  | 4.23    | 0.003      |              | 0.001    |
| Inferior precuneus                                                                | L    | -9                     | -55 | 10  | 4.63    | 0.001      |              | 0.001    |
| Anterior insula                                                                   | L    | -36                    | 20  | -8  | 4.75    |            | 0.048        | 0.001    |
| Inferior frontal gyrus                                                            | L    | -42                    | 23  | 1   | 3.14    |            | 0.025        | 0.001    |
| Anterior cerebellum                                                               | L    | -18                    | -43 | -35 | 4.49    | 0.002      |              | 0.000    |
| Parahippocampus                                                                   | L    | -21                    | -31 | -17 | 3.96    |            | 0.05         | 0.001    |
| Inferior frontal gyrus                                                            | R    | 36                     | 26  | 16  | 4.19    |            | 0.03         | 0.001    |
| Anterior cingulate                                                                | R    | 6                      | 23  | 25  | 4.11    | 0.004      |              | 0.001    |
| Middle cingulate                                                                  | L    | -9                     | 17  | 31  | 3.27    | 0.008      |              | 0.001    |
| DLPFC                                                                             | L    | -57                    | 17  | 34  | 4.07    | 0.004      |              | 0.001    |
| Lateral orbitofrontal cortex                                                      | L    | -48                    | 47  | -2  | 3.93    | 0.005      |              | 0.001    |
| Posterior cerebellum                                                              | L    | -6                     | -52 | -50 | 3.91    | 0.005      |              | 0.001    |
| SMA                                                                               | R    | 9                      | 20  | 67  | 3.06    | 0.029      |              | 0.001    |
| Middle temporal gyrus                                                             | R    | 60                     | -4  | -23 | 3.67    | 0.009      |              | 0.001    |
| Inferior frontal gyrus                                                            | L    | -54                    | 32  | 16  | 3.59    | 0.010      |              | 0.001    |
| Dorsal caudate nucleus                                                            | L    | -9                     | 20  | -5  | 4.39    | 0.015      |              | 0.001    |
| Dorsal caudate nucleus                                                            | R    | 12                     | 2   | 18  | 4.17    | 0.023      |              | 0.001    |
| Superior parietal lobe                                                            | L    | -33                    | -70 | 43  | 3.42    | 0.014      |              | 0.001    |
| <b>Subtraction Condition 3 &gt; baseline of results presented in Figure 5C</b>    |      |                        |     |     |         |            |              |          |
| Precentral gyrus                                                                  | L    | -33                    | -22 | 61  | 11.41   | 0.0001     |              | 0.0001   |
| Postcentral gyrus                                                                 | L    | -39                    | -34 | 49  | 9.92    | 0.0001     |              | 0.0001   |
| Supramarginal                                                                     | L    | -57                    | -22 | 40  | 9.62    | 0.0001     |              | 0.0001   |
| Anterior cerebellum                                                               | R    | 33                     | -55 | -23 | 9.27    | 0.0001     |              | 0.0001   |
| Superior parietal cortex                                                          | R    | 24                     | -64 | 61  | 7.91    | 0.0001     |              | 0.0001   |
| Precuneus                                                                         | R    | 18                     | -67 | 52  | 7.11    | 0.0001     |              | 0.0001   |

|                         |   |     |     |     |      |       |        |
|-------------------------|---|-----|-----|-----|------|-------|--------|
| Lateral premotor cortex | L | -57 | 5   | 40  | 7.34 | 0.022 | 0.0001 |
| Postcentral gyrus       | R | 36  | -31 | 43  | 6.70 | 0.042 | 0.0001 |
| Thalamus                | L | -15 | -22 | 7   | 6.18 | 0.013 | 0.0001 |
| Dorsal premotor cortex  | R | 27  | -7  | 58  | 6.06 | 0.037 | 0.0001 |
| Posterior cerebellum    | R | 18  | -64 | -44 | 5.63 | 0.026 | 0.0001 |
| Putamen                 | L | -24 | 5   | 4   | 3.91 | 0.007 | 0.0001 |

378 P(FWE): statistical test whole-brain corrected for multiple comparison with threshold at the cluster level.

379 SVC(FWE): small volume correction (SVC) with sphere radius of 10 mm corrected for multiple  
380 comparisons with threshold at the cluster level.

381 P(unc.): statistical test whole-brain uncorrected.

382 Hemi: hemisphere – L (left), R (right).

383 -DLPFC: dorsolateral prefrontal cortex; SMA: supplementary motor area; PFC : prefrontal cortex.

384

385

386

387

388

389

390

391

392

393

394

395

396

397

398

399

400

401

402

403

404



405 Table S3. Neural activity during the action sequence execution period. Related to results in Figure 7.

| Brain region                                                                                      | Hemi | Coordinates<br>[x,y,z] |     |     | T-value | P<br>(FWE) | SVC<br>(FWE) | P (unc.) |
|---------------------------------------------------------------------------------------------------|------|------------------------|-----|-----|---------|------------|--------------|----------|
| <b>Subtraction Condition 1 &gt; Condition 3 of results presented in Figure 7A</b>                 |      |                        |     |     |         |            |              |          |
| Superior frontal gyrus                                                                            | R    | 21                     | 2   | 67  | 5.56    | 0.047      |              | 0.000    |
| Inferior parietal cortex                                                                          | R    | 54                     | -40 | 55  | 4.74    |            | 0.024        | 0.000    |
| Inferior parietal cortex                                                                          | L    | -66                    | -34 | 37  | 4.39    |            | 0.050        | 0.001    |
| Precuneus                                                                                         | R    | 6                      | -55 | 58  | 4.15    |            |              | 0.001    |
| Insula                                                                                            | R    | 33                     | 20  | 7   | 3.89    |            |              | 0.001    |
| Superior frontal gyrus                                                                            | L    | -21                    | 2   | 67  | 3.86    |            |              | 0.001    |
| Inferior frontal gyrus                                                                            | R    | 51                     | 14  | 13  | 3.80    |            |              | 0.001    |
| Inferior frontal gyrus                                                                            | L    | -54                    | 11  | 22  | 3.62    |            |              | 0.001    |
| <b>Subtraction Condition 2 &gt; Condition 3 of results presented in Figure 7B</b>                 |      |                        |     |     |         |            |              |          |
| Superior frontal gyrus                                                                            | R    | 18                     | 11  | 58  | 4.64    | 0.042      |              | 0.000    |
| Inferior frontal gyrus                                                                            | L    | -33                    | 35  | 10  | 4.42    |            | 0.011        | 0.001    |
| Precuneus                                                                                         | L    | -2                     | -64 | 58  | 4.41    |            | 0.011        | 0.001    |
| Supramarginal                                                                                     | L    | -63                    | -34 | 37  | 3.39    |            | 0.012        | 0.001    |
| Supramarginal                                                                                     | R    | 54                     | -40 | 55  | 4.36    |            | 0.012        | 0.001    |
| Anterior cingulate                                                                                | R    | 12                     | 32  | 13  | 4.29    |            | 0.014        | 0.001    |
| Posterior cerebellum                                                                              | R    | 33                     | -70 | -47 | 4.19    |            | 0.018        | 0.001    |
| DLPFC                                                                                             | R    | 27                     | 32  | 31  | 4.10    | 0.021      |              | 0.000    |
| Inferior operculum                                                                                | L    | -51                    | 17  | 31  | 3.89    |            | 0.032        | 0.001    |
| <b>Subtraction Condition 3 &gt; (Condition 1 + Condition 2) of results presented in Figure 7C</b> |      |                        |     |     |         |            |              |          |
| Precentral gyrus                                                                                  | L    | -33                    | -28 | 55  | 7.15    | 0.0001     |              | 0.0001   |
| Posterior cingulate                                                                               | L    | -3                     | -40 | 28  | 5.83    | 0.0001     |              | 0.0001   |
| Precuneus                                                                                         | L    | 12                     | -52 | 31  | 5.74    |            | 0.0001       | 0.0001   |
| SMA                                                                                               | L    | -6                     | -19 | 49  | 5.51    |            | 0.0001       | 0.0001   |
| Insula                                                                                            | L    | -39                    | -10 | 10  | 5.38    | 0.001      |              | 0.0001   |
| Angular gyrus                                                                                     | R    | 57                     | -61 | 34  | 4.42    |            | 0.001        | 0.0001   |
| Angular gyrus                                                                                     | L    | -51                    | -64 | 37  | 5.32    | 0.005      |              | 0.0001   |
| Insula                                                                                            | R    | 42                     | -1  | 16  | 4.97    | 0.006      |              | 0.0001   |
| Putamen                                                                                           | L    | -30                    | -7  | -5  | 3.86    |            | 0.003        | 0.0001   |

406 P (FWE): statistical test whole-brain corrected for multiple comparison with threshold at the cluster  
407 level.

408 SVC (FWE): small volume correction (SVC) with sphere radius of 10 mm corrected for multiple  
409 comparisons with threshold at the cluster level.

410 P (unc.): statistical test whole-brain uncorrected.

411 Hemi: hemisphere – L (left), R (right).

412 -DLPFC: dorsolateral prefrontal cortex; SMA: supplementary motor area.

413

414 Table S4. Neural activity modulated by the reward score at the reward feedback period at the whole-  
 415 brain level. Related to results in Figure 8.

| Brain region                              | Hemi | Coordinates<br>[x,y,z] |     |     | T-value | P<br>(FWE) | SVC<br>(FWE) | P (unc.) |
|-------------------------------------------|------|------------------------|-----|-----|---------|------------|--------------|----------|
| <b>Condition 1 immediate start trials</b> |      |                        |     |     |         |            |              |          |
| Ventral putamen                           | R    | 15                     | 5   | -8  | 6.06    | 0.006      |              | 0.000    |
| Caudate head                              | R    | 12                     | 14  | -2  | 5.28    | 0.006      |              | 0.000    |
| Precuneus                                 | R    | 6                      | -76 | 37  | 4.58    |            | 0.011        | 0.000    |
| Inferior parietal cortex                  | L    | -54                    | -61 | 43  | 4.32    |            | 0.005        | 0.000    |
| <b>Condition 2 immediate start trials</b> |      |                        |     |     |         |            |              |          |
| External globus pallidus                  | L    | -24                    | -13 | -8  | 8.09    | 0.001      |              | 0.000    |
| Hippocampus                               | L    | -36                    | -19 | -17 | 6.20    | 0.001      |              | 0.000    |
| Parahippocampus                           | L    | -18                    | -22 | -17 | 5.33    | 0.001      |              | 0.000    |
| Putamen                                   | R    | 30                     | -13 | -8  | 5.08    |            | 0.003        | 0.000    |
| Hippocampus                               | R    | 39                     | -22 | -14 | 3.98    |            | 0.019        | 0.001    |
| Putamen                                   | R    | 21                     | 2   | -8  | 4.53    |            | 0.003        | 0.000    |
| Caudate head                              | R    | 12                     | 20  | 1   | 4.19    |            | 0.009        | 0.000    |
| Caudate head                              | L    | -9                     | 8   | -2  | 4.58    |            | 0.003        | 0.000    |
| <b>Condition 1 delay start trials</b>     |      |                        |     |     |         |            |              |          |
| Caudate head                              | L    | -6                     | 14  | -8  | 4.39    | 0.043      |              | 0.001    |
| VMPFC                                     | L    | -9                     | 26  | -11 | 4.12    |            | 0.039        | 0.001    |
| Ventral putamen                           | L    | -18                    | 2   | -8  | 4.87    |            | 0.041        | 0.001    |
| <b>Condition 2 delay start trials</b>     |      |                        |     |     |         |            |              |          |
| Ventral putamen                           | R    | 27                     | 8   | -2  | 4.28    | 0.015      |              | 0.000    |
| Caudate head                              | R    | 12                     | 11  | 7   | 4.05    |            | 0.010        | 0.001    |

416 P (FWE): statistical test whole-brain corrected for multiple comparison with threshold at the cluster  
 417 level.

418 SVC (FWE): small volume correction (SVC) with sphere radius of 10 mm corrected for multiple  
 419 comparisons with threshold at the cluster level.

420 P (unc.): statistical test whole-brain uncorrected.

421 Hemi: hemisphere – L (left), R (right).

422 -DLPFC: dorsolateral prefrontal cortex; SMA: supplementary motor area.

423
